# Supplementary material
Source: PubMed Central journal article supplement (PMC1766433)

Life span (days)

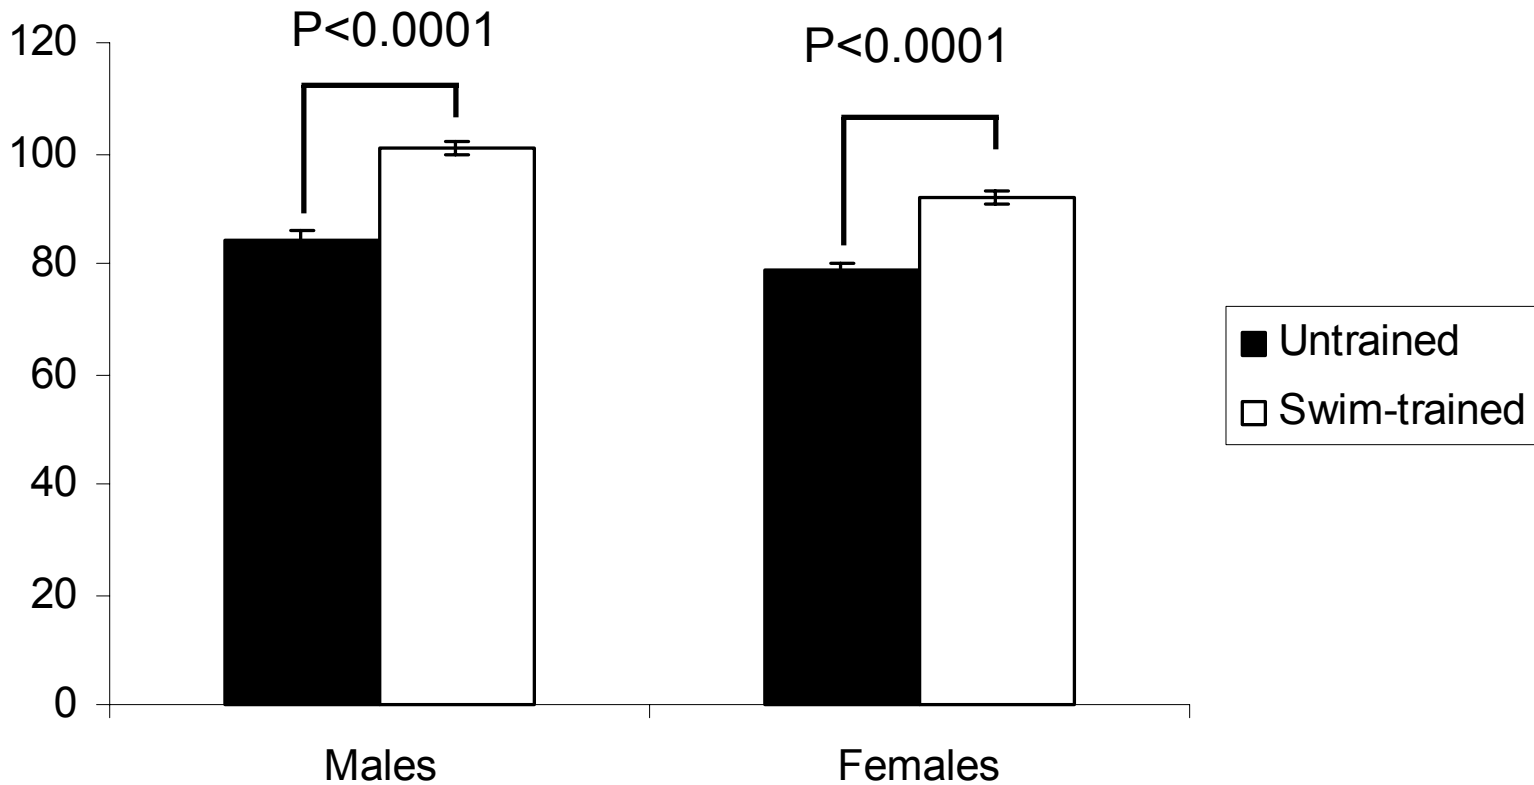

Supplement: pnas_0606663104_1.pdf [file pnas_0606663104_1.pdf]

**A**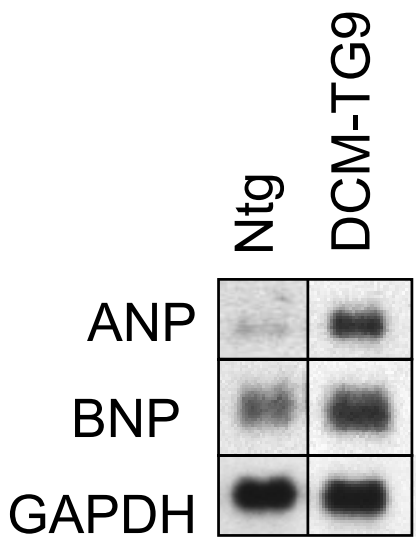**B**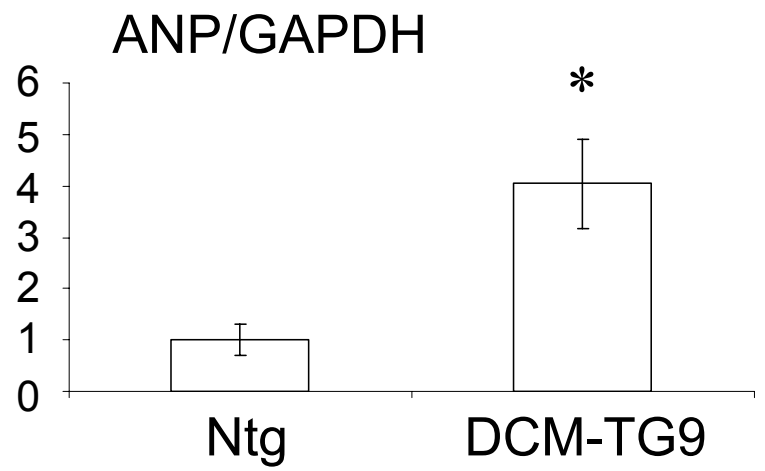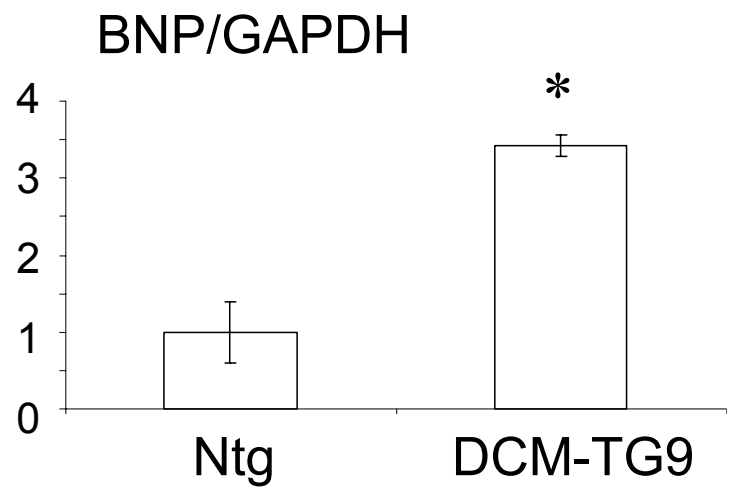

Supplement: pnas_0606663104_2.pdf [file pnas_0606663104_2.pdf]

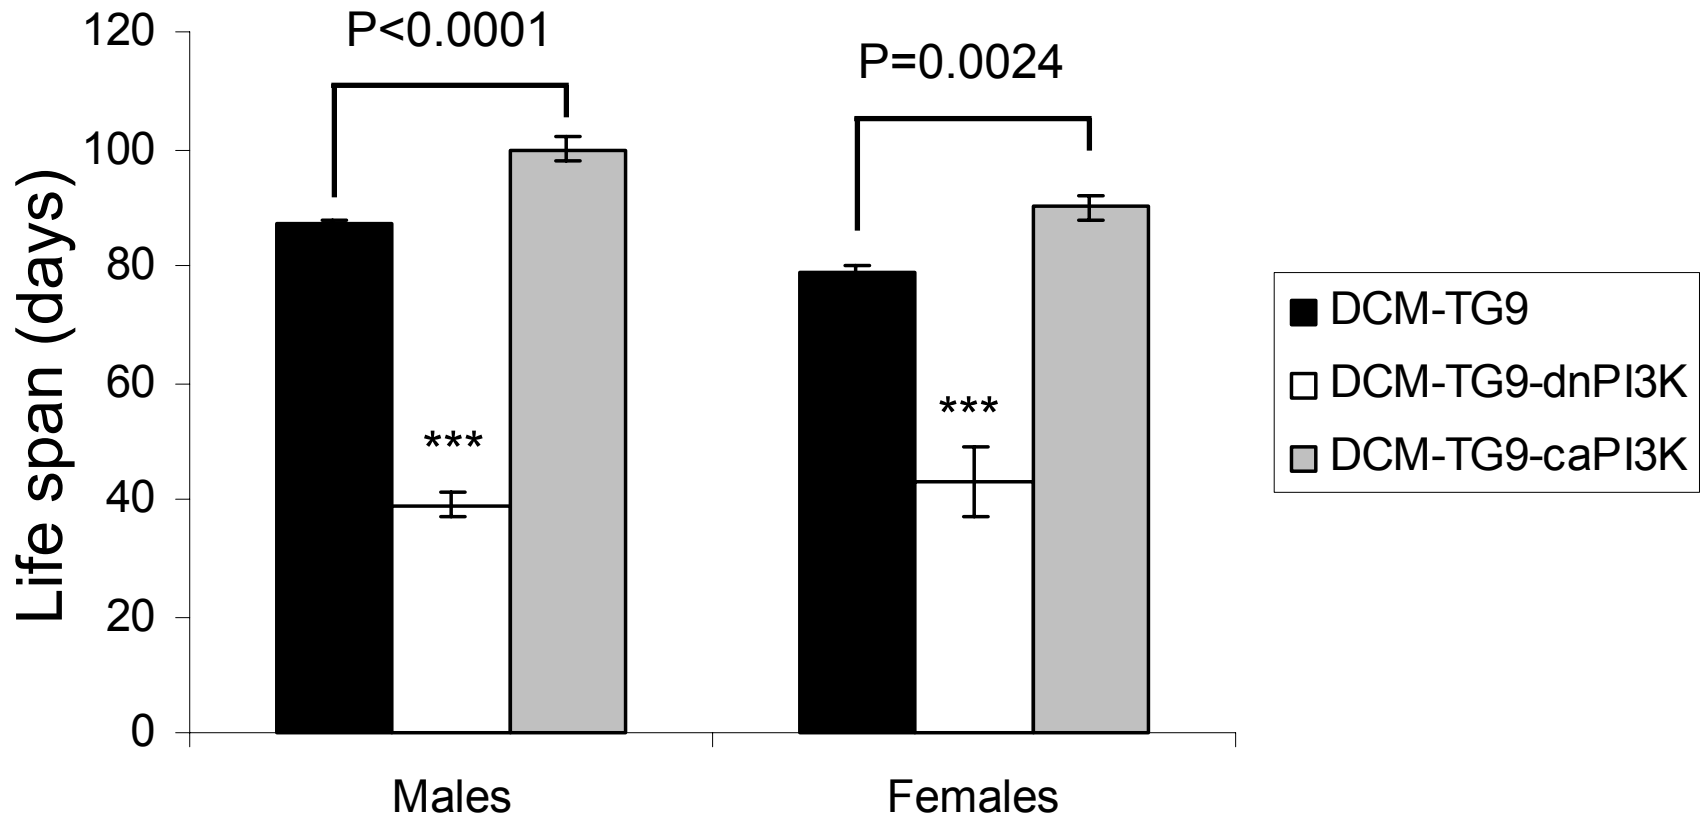

\*\*\* P<0.0001 vs all other groups

Supplement: pnas_0606663104_3.pdf [file pnas_0606663104_3.pdf]

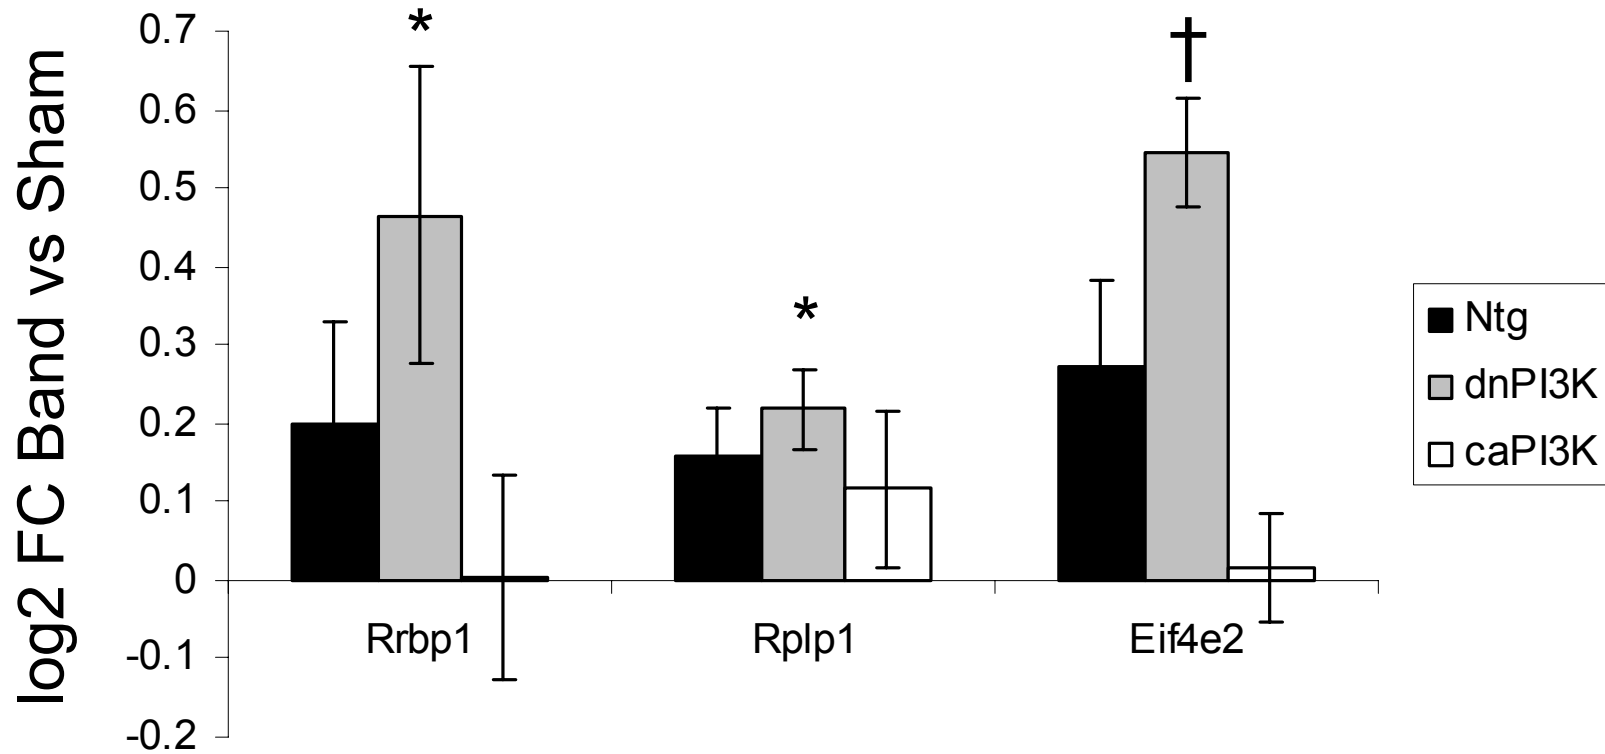

\* adjusted  $P < 0.05$  for Band vs Sham

† adjusted  $P < 0.005$  for Band vs Sham

Supplement: pnas_0606663104_4.pdf [file pnas_0606663104_4.pdf]

# Apoptosis-related Genes

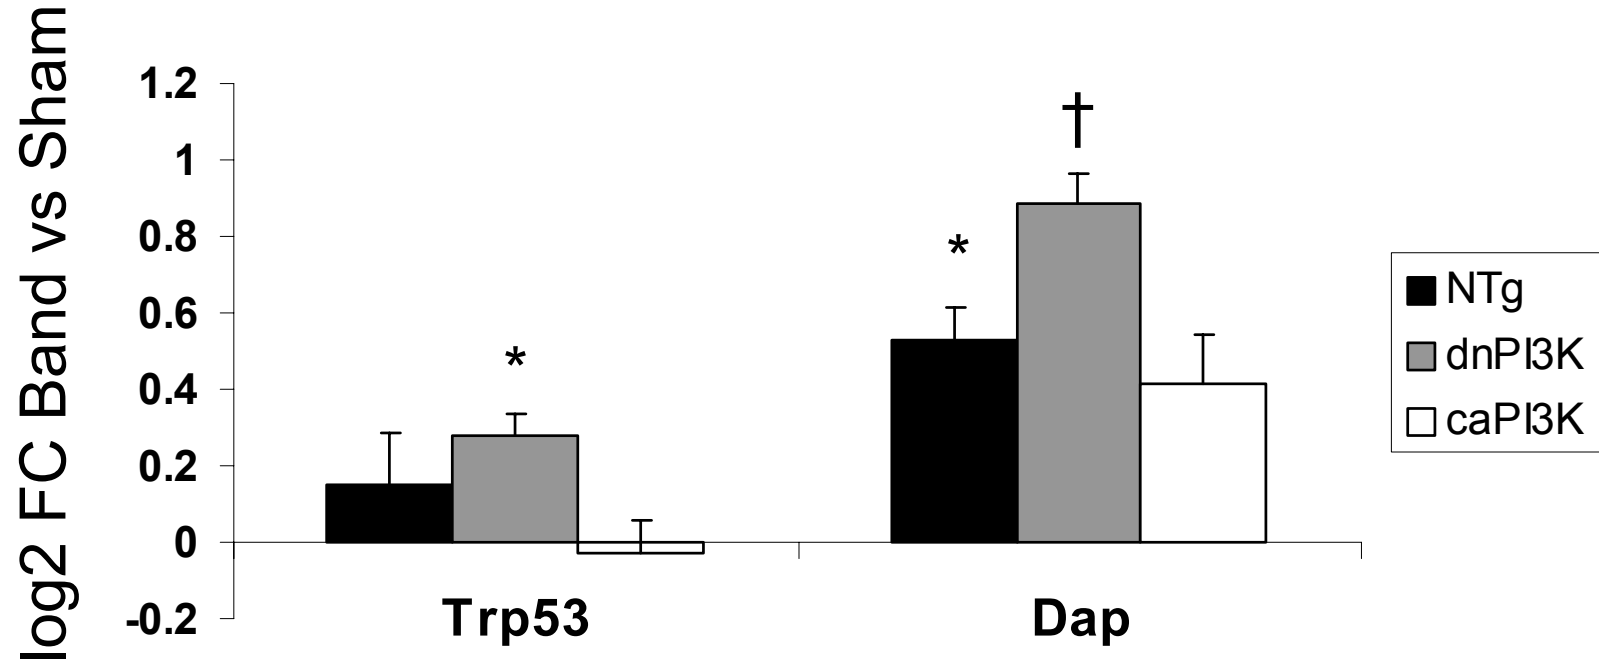

\* adjusted  $P < 0.05$  for Band vs Sham

† adjusted  $P < 0.001$  for Band vs Sham

Supplement: pnas_0606663104_5.pdf [file pnas_0606663104_5.pdf]

**Percentage change in  
HW/BW vs Ntg response**

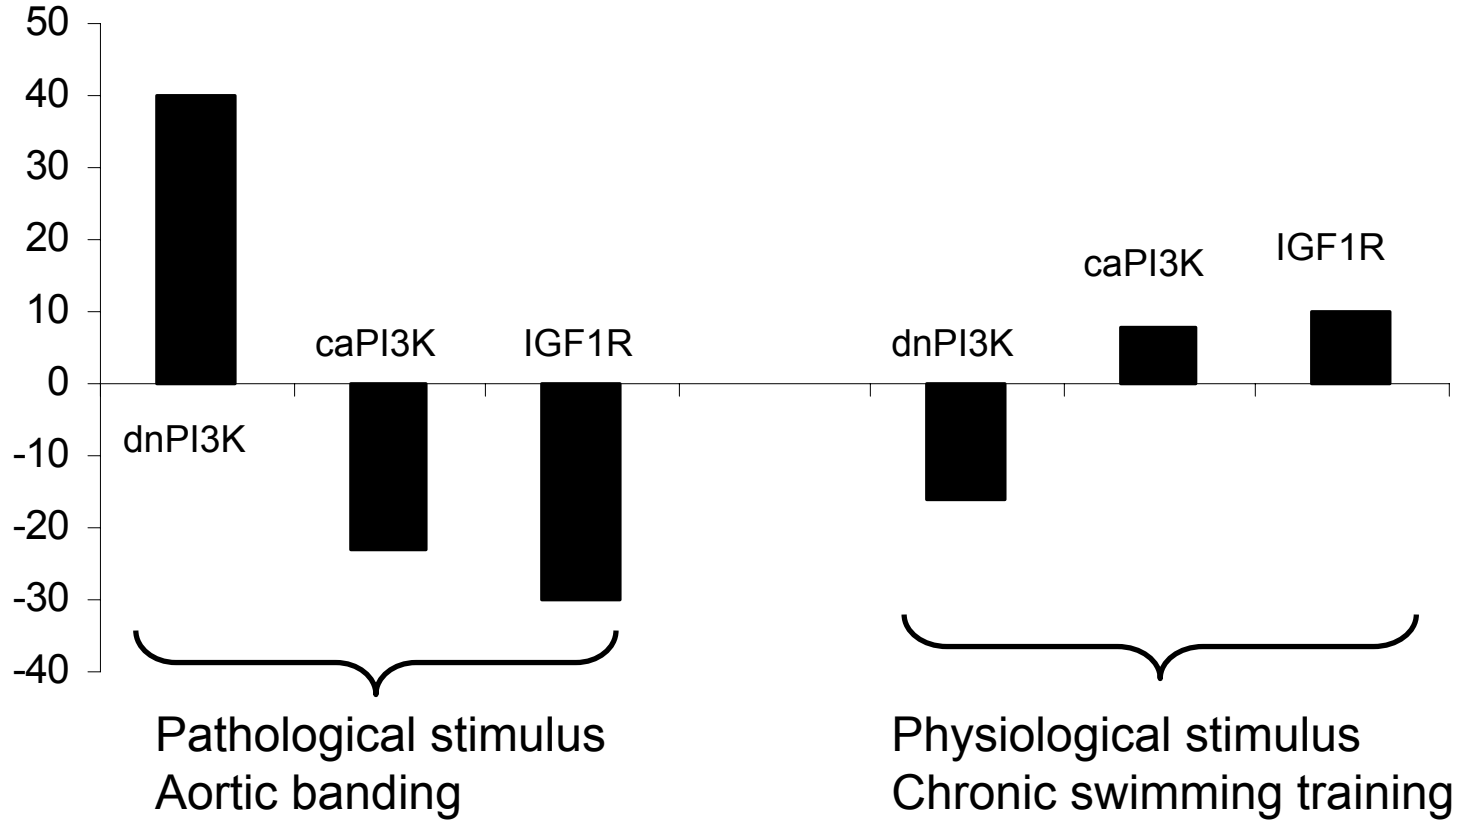

Supplement: pnas_0606663104_6.pdf [file pnas_0606663104_6.pdf]
